# Supplementary material
Source: publisher figshare collection journal article supplement (https://sage.figshare.com/ndownloader/files/23208374)
Supplement: Supplementary file 1 [file 23208374]

Shiga et al. Long-term observation of the progression from nodal marginal zone lymphoma to diffuse large B-cell lymphoma in a dog.

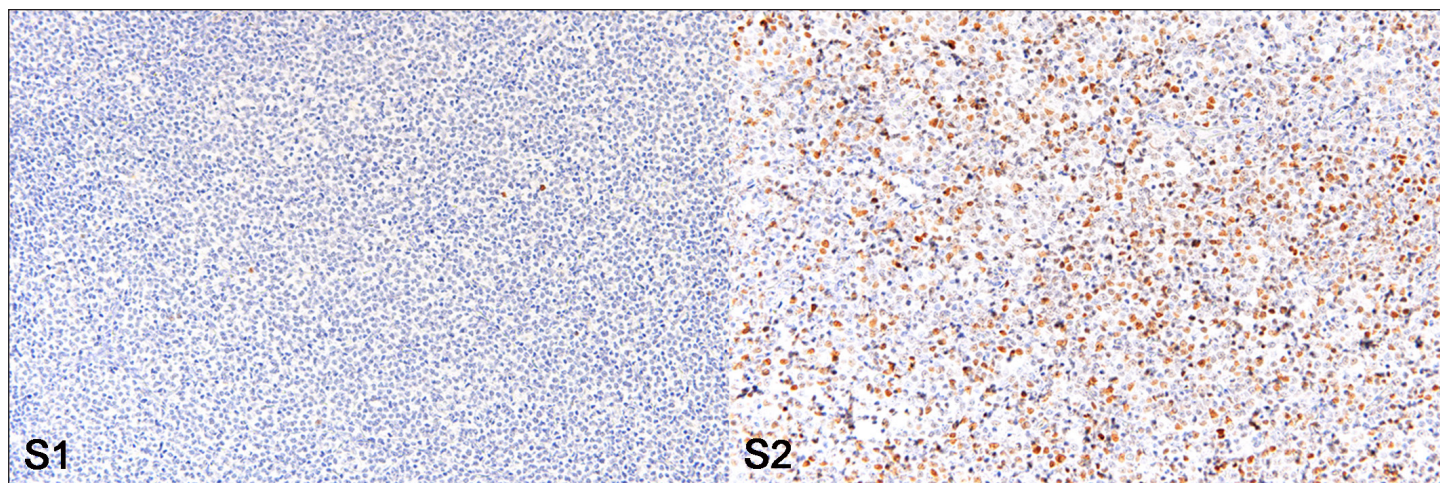

**Supplemental Figure S1.** Late-stage nodal marginal zone lymphoma, right mandibular lymph node dog. The nuclear labeling for p53 is rarely observed. Immunohistochemistry (IHC).

**Supplemental Figure S2.** Diffuse large B-cell lymphoma, hepatic lymph node, dog. The nuclear labeling for p53 is frequently observed. IHC.

|                         |                   |            |            |           |            |         |
|-------------------------|-------------------|------------|------------|-----------|------------|---------|
| Right popliteal LN      | (nMZL)            | GCAAGAGACC | TGCTGGTCTC | TTTGACTAC | TGGGGCCAGG | GAACCCT |
| Right mandibular LN     | (late-stage nMZL) | .....      | .....      | .....     | .....      | .....   |
| Superficial cervical LN | (DLBCL)           | .....      | .....      | .....     | .....      | .....   |
| Hepatic LN              | (DLBCL)           | .....      | .....      | .....     | .....      | .....   |

S3

**Supplemental Figure S3.** Identical DNA sequence of complementarity determining region-3 of the immunoglobulin heavy chain gene from each lymph node with different types of lymphoma in a dog. LN, lymph node; nMZL, nodal marginal zone lymphoma; DLBCL, diffuse large B-cell lymphoma.

Veterinary Pathology: Supplemental Materials.

Shiga et al. Long-term observation of the progression from nodal marginal zone lymphoma to diffuse large B-cell lymphoma in a dog.

Supplemental Table S1. Primary antibodies used for immunohistochemistry.

| Antibody<br>against | Host &<br>Clone | Dilution | Antigen retrieval<br>(buffer) | Source                                         |
|---------------------|-----------------|----------|-------------------------------|------------------------------------------------|
| CD3                 | Rp              | Rtu      | Autoclave<br>(Citrate, pH6.0) | Dako, Tokyo, Japan                             |
| CD20                | Rp              | 1:400    | No<br>pre-treatment           | Thermo Scientific, Waltham, MA,<br>USA         |
| CD79a               | Mm,<br>HM57     | 1:50     | Autoclave<br>(EDTA, pH9.0)    | Dako, Tokyo, Japan                             |
| Bcl-2               | Rp              | 1:100    | Autoclave<br>(EDTA, pH9.0)    | Cell Signaling Technology,<br>Danvers, MA, USA |
| p53                 | Rp              | 1:50     | Autoclave<br>(EDTA, pH9.0)    | Santa Cruz, Dallas, TX, USA                    |
| Ki67                | Mm,<br>MIB-1    | Rtu      | Autoclave<br>(Citrate, pH6.0) | Dako, Tokyo, Japan                             |

Abbreviations: Rp, Rabbit polyclonal; Mm, Mouse monoclonal; Rtu, Ready-to-use
